# Supplementary material for: Characterization of a C-Type Lectin Domain-Containing Protein with Antibacterial Activity from Pacific Abalone (Haliotis discus hannai)
Source: MDPI journal article supplement (doi:10.3390/ijms23020698), 2022-01-09
Supplement: s1 [file s1]

**Table S1.** List of protein sequences used in phylogenetic tree construction.

| <b>Name in Phylogenetic tree</b>    | <b>Organism</b>                                         | <b>Definition</b>                                       | <b>Accession</b> |
|-------------------------------------|---------------------------------------------------------|---------------------------------------------------------|------------------|
| H. laevigata Perlucin               | <i>Haliotis laevigata</i> (Greenlip abalone)            | Perlucin                                                | P82596           |
| H. ddiscus Perlucin 1               | <i>Haliotis discus discus</i> (Disc abalone)            | perlucin 1                                              | ABO26590.1       |
| M. galloprovincialis CTL6           | <i>Mytilus galloprovincialis</i> (Mediterranean mussel) | C-type lectin 6                                         | AJQ21497.1       |
| A. irradians CTL                    | <i>Argopecten irradians</i> (Bay scallop)               | C-type lectin                                           | ADL27440.1       |
| P. flavescens CTL3                  | <i>Perca flavescens</i> (Yellow perch)                  | C-type lectin 3                                         | ACO82036.1       |
| M. galloprovincialis CTL2           | <i>Mytilus galloprovincialis</i> (Mediterranean mussel) | C-type lectin 2                                         | AJQ21493.1       |
| M. galloprovincialis CTL3           | <i>Mytilus galloprovincialis</i> (Mediterranean mussel) | C-type lectin 3                                         | AJQ21494.1       |
| H. diversicolor Perlucin 5          | <i>Haliotis diversicolor</i>                            | perlucin 5                                              | AEQ16379.1       |
| C. virginica CTLD10                 | <i>Crassostrea virginica</i> (Eastern oyster)           | C-type lectin domain family 10 member A-like isoform X1 | XP_022293075.1   |
| R. philippinarum CTL                | <i>Ruditapes philippinarum</i> (Manila clam)            | C-type lectin domain family member isoform crab 3       | AZS54110.1       |
| M. musculus Clec10A                 | <i>Mus musculus</i> (Mouse)                             | C-type lectin domain family 10 member A                 | P49300           |
| M. musculus Collectin               | <i>Mus musculus</i> (Mouse)                             | Collectin-12                                            | Q8K4Q8           |
| L. unguis Perlucin                  | <i>Lingula unguis</i>                                   | Perlucin                                                | A0A1S3IWF5       |
| P. reticulata CTLD protein          | <i>Poecilia reticulata</i> (Guppy)                      | C-type lectin domain-containing protein                 | A0A3P9N573       |
| P. nyererei CTLD protein            | <i>Pundamilia nyererei</i>                              | C-type lectin domain-containing protein                 | A0A3B4F105       |
| O. niloticus CTLD protein           | <i>Oreochromis niloticus</i> (Nile tilapia)             | C-type lectin domain-containing protein                 | I3JBE6           |
| M. yessoensis Perlucin-like protein | <i>Mizuhopecten yessoensis</i> (Japanese scallop)       | Perlucin-like protein                                   | A0A210R405       |
| M. yessoensis Perlucin              | <i>Mizuhopecten yessoensis</i> (Japanese scallop)       | Perlucin                                                | A0A210Q3W2       |
| C. gigas Perlucin                   | <i>Crassostrea gigas</i> (Pacific oyster)               | Perlucin                                                | K1QRE6           |
| N. brichardi CTLD protein           | <i>Neolamprologus brichardi</i> (Fairy cichlid)         | C-type lectin domain-containing protein                 | A0A3Q4MIS0       |
| C. gigas CTMR2                      | <i>Crassostrea gigas</i> (Pacific oyster)               | C-type mannose receptor 2                               | K1PCU5           |

Abbreviations: CTL, C-type lectin; CTLD, C-type lectin domain-containing protein.
